# Supplementary material
Source: PubMed Central journal article supplement (PMC5198492)
Supplement: JB.00459-16_zjb999094298s1.pdf [file JB.00459-16_zjb999094298s1.pdf]

**Figure S1: Workflow employed to explore RNAP composition.**

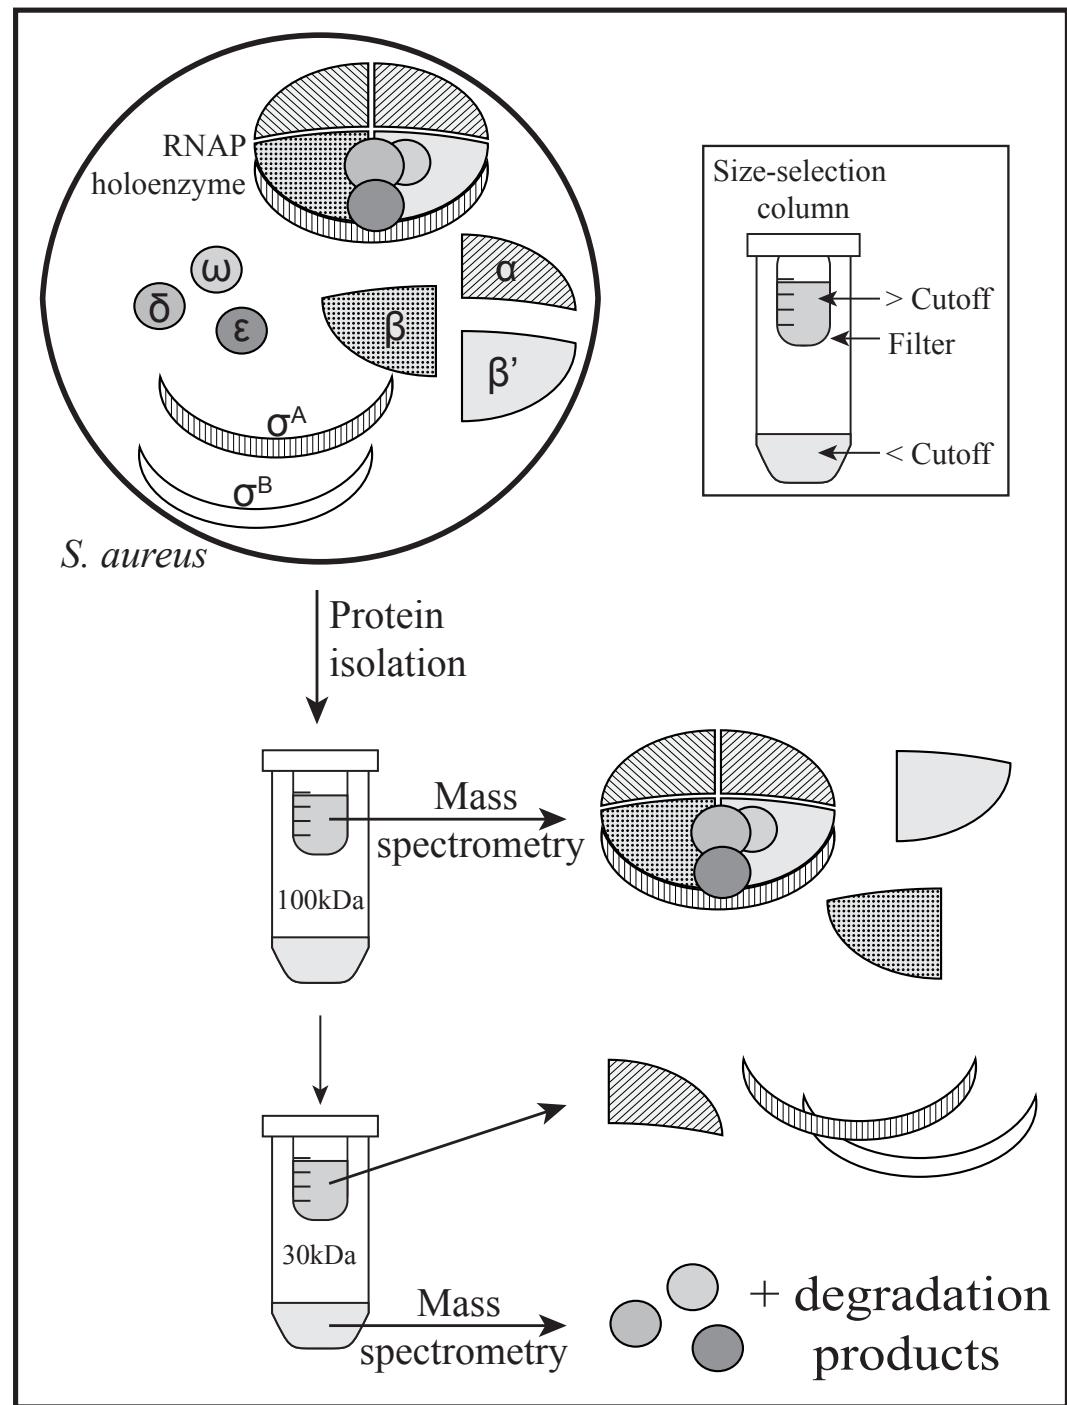

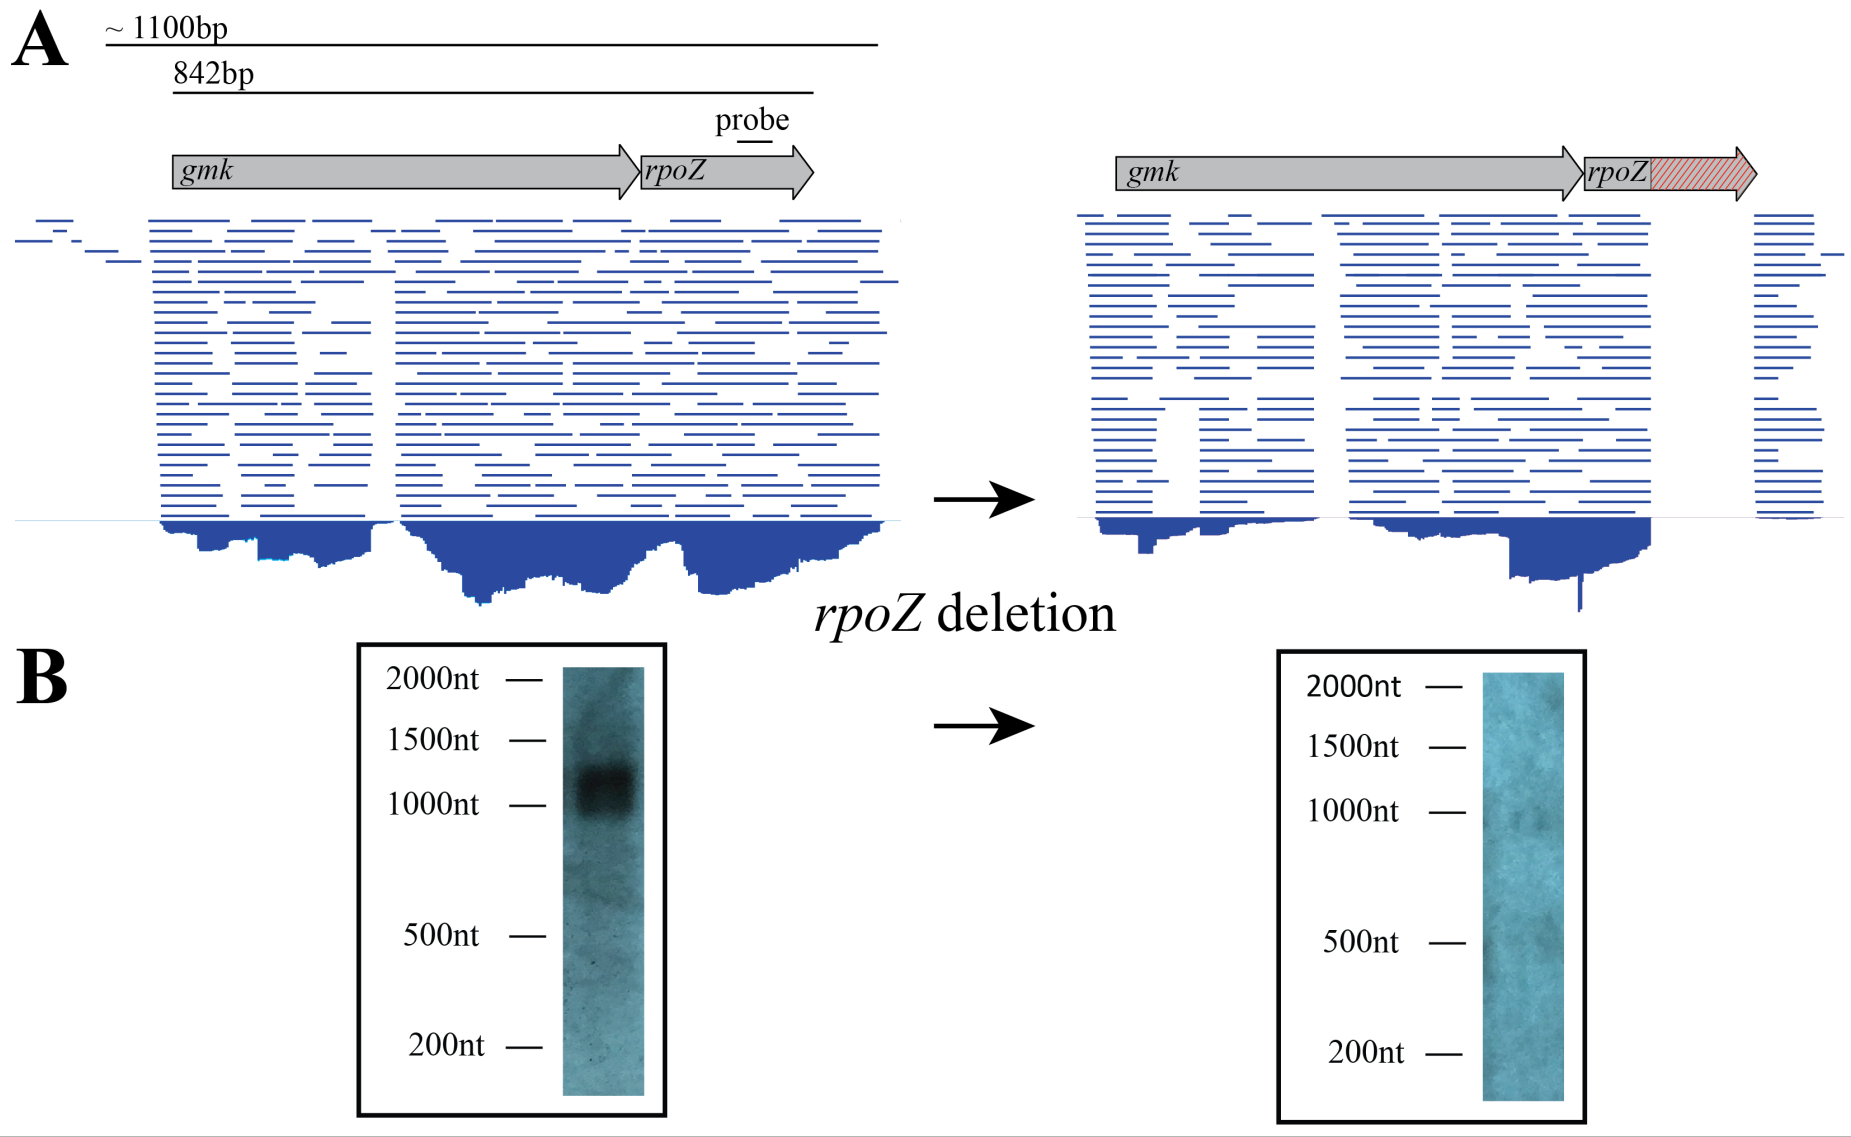

**Figure S2: Exploration of the *gmK-rpoZ* operon architecture in *S. aureus*.** **A)** RNA-sequencing analysis, or **B)** Northern blots, of the wild-type and *rpoZ* deletion mutant. The probe used in B is demarcated on the *rpoZ* gene in A. Lines denoting the lengths of 842 bp and ~1100 bp refer to the predicted size of the *gmK-rpoZ* ORF, and the actual length of this transcriptional unit detected by Northern blot, respectively.

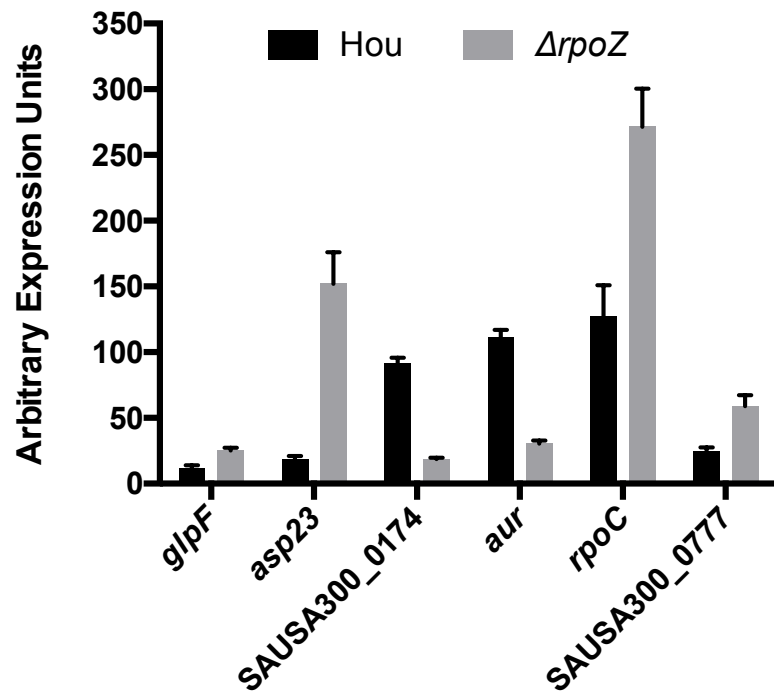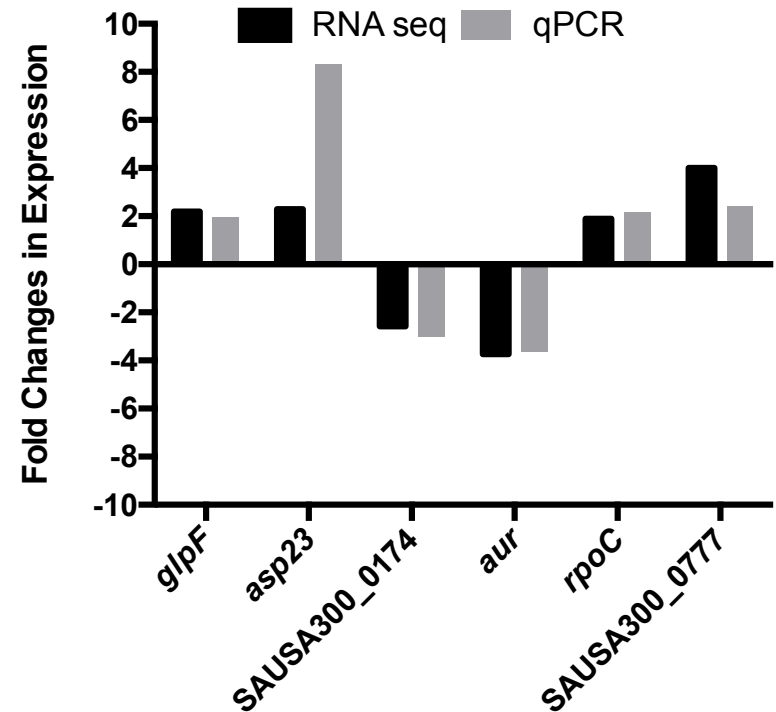

**Figure S3: Validation of transcriptional changes from RNA-sequencing experiments using RT-qPCR.** **A)** RNA-sequencing data was confirmed using RT-qPCR analysis for representative genes. Error bars are shown  $\pm$ SEM. **B)** Fold-changes for RT-qPCR and RNA-sequencing were subsequently compared.

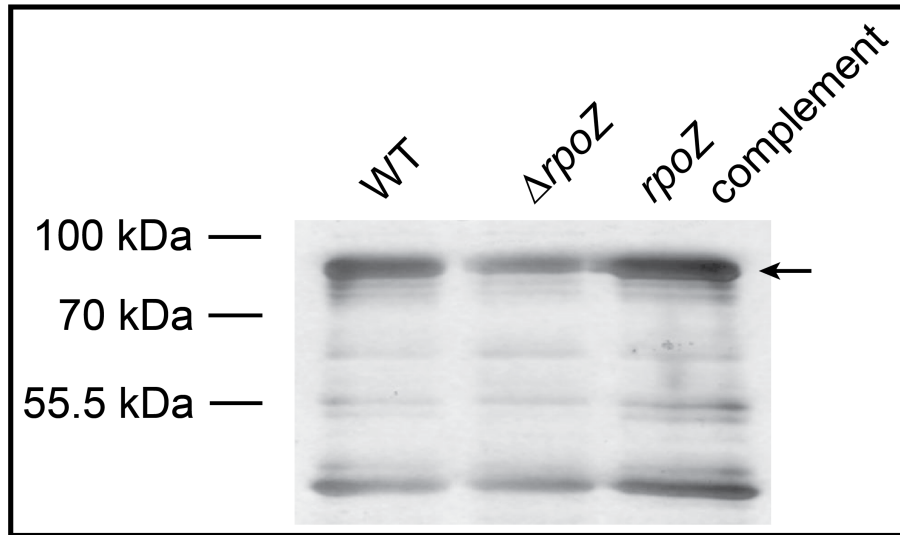

**Figure S4:  $\omega$  affects the abundance *S. aureus* lipases.** Secretomes of the *S. aureus* wild-type,  $\Delta rpoZ$  mutant and complemented strains after 24 h of growth were assessed via SDS-PAGE. A black arrow denotes the protein band found to have decreased abundance, which was identified as two different lipases by mass-spectrometric analysis.
