# Supplementary material
Source: PubMed Central journal article supplement (PMC5198492)
Supplement: JB.00459-16_zjb999094298s2.pdf [file JB.00459-16_zjb999094298s2.pdf]

**Table S1:** Differentially expressed genes in the *ΔrpoZ* mutant strain

| Gene name/designation        | Fold Change in <i>ΔrpoZ</i> | Function                |
|------------------------------|-----------------------------|-------------------------|
| <b>Hypothetical proteins</b> |                             |                         |
| SAUSA300_0431                | +∞                          | Hypothetical protein    |
| SAUSA300_1205                | 7.54                        | Hypothetical protein    |
| SAUSA300_2493                | 7.32                        | Hypothetical protein    |
| SAUSA300_2132                | 5.81                        | Hypothetical protein    |
| SAUSA300_1606                | 5.42                        | Hypothetical protein    |
| SAUSA300_0575                | 3.88                        | Hypothetical protein    |
| SAUSA300_1739                | 3.83                        | Hypothetical protein    |
| SAUSA300_0465                | 3.29                        | Hypothetical protein    |
| SAUSA300_1335                | 3.22                        | Hypothetical protein    |
| SAUSA300_1742                | 3.11                        | Hypothetical protein    |
| SAUSA300_1746                | 2.92                        | Hypothetical protein    |
| SAUSA300_0392                | 2.88                        | Hypothetical protein    |
| SAUSA300_1740                | 2.84                        | Hypothetical protein    |
| SAUSA300_1180                | 2.73                        | Hypothetical protein    |
| SAUSA300_2131                | 2.58                        | Hypothetical protein    |
| SAUSA300_1857                | 2.41                        | Hypothetical protein    |
| SAUSA300_0779                | 2.4                         | Hypothetical protein    |
| SAUSA300_1743                | 2.34                        | Hypothetical protein    |
| SAUSA300_1759                | 2.31                        | Hypothetical protein    |
| SAUSA300_1247                | 2.23                        | Hypothetical protein    |
| SAUSA300_1915                | 2.21                        | Hypothetical protein    |
| SAUSA300_0814                | 2.2                         | Hypothetical protein    |
| SAUSA300_1701                | 2.12                        | Hypothetical protein    |
| SAUSA300_0642                | 2.08                        | Hypothetical protein    |
| SAUSA300_1582                | 2.07                        | Hypothetical protein    |
| SAUSA300_2527                | 2.06                        | Hypothetical protein    |
| SAUSA300_2236                | -2.04                       | Hypothetical protein    |
| SAUSA300_0824                | -2.08                       | Hypothetical protein    |
| SAUSA300_0177                | -2.09                       | Hypothetical protein    |
| SAUSA300_1863                | -2.18                       | Hypothetical protein    |
| SAUSA300_1748                | -2.21                       | Transposase, frameshift |
| SAUSA300_1230                | -2.39                       | Hypothetical protein    |
| SAUSA300_1380                | -2.62                       | Hypothetical protein    |
| SAUSA300_0048                | -2.9                        | Hypothetical protein    |
| SAUSA300_0174                | -3.02                       | Hypothetical protein    |
| SAUSA300_0192                | 2.19                        | Hypothetical protein    |
| SAUSA300_0805                | -2.19                       | Hypothetical protein    |

**Transport**

|               |       |                                                                     |
|---------------|-------|---------------------------------------------------------------------|
| <i>glpF</i>   | 8.74  | Glycerol uptake facilitator                                         |
| SAUSA300_0208 | 4.17  | Putative maltose ABC transporter, ATP-binding protein               |
| <i>ptsG</i>   | 3.76  | Glucose transporter subunit IIABC                                   |
| SAUSA300_2466 | 3.67  | ABC transporter permease protein                                    |
| SAUSA300_0209 | 3.65  | Putative maltose ABC transporter, maltose-binding protein           |
| SAUSA300_2408 | 3.37  | Oligopeptide permease, ATP-binding protein                          |
| SAUSA300_0941 | 3.07  | Putative ferrichrome ABC transporter                                |
| SAUSA300_0210 | 2.98  | Maltose ABC transporter, permease protein                           |
| 4.5S RNA      | 2.74  | Signal recognition particle                                         |
| SAUSA300_2407 | 2.6   | Peptide ABC transporter, ATP-binding protein                        |
| <i>fhuA</i>   | 2.4   | Ferrichrome transport ATP-binding protein                           |
| <i>opuD</i>   | 2.39  | Glycine betaine transporter                                         |
| <i>gntP</i>   | 2.35  | Gluconate permease                                                  |
| SAUSA300_2409 | 2.25  | Oligopeptide permease                                               |
| SAUSA300_0211 | 2.21  | Maltose ABC transporter, permease protein                           |
| SAUSA300_0068 | 2.02  | Cadmium-exporting ATPase, truncation                                |
| SAUSA300_2454 | -2.05 | ABC Transporter                                                     |
| <i>tatC</i>   | -2.07 | Sec-independent protein translocase                                 |
| SAUSA300_2453 | -2.1  | ABC Transporter                                                     |
| SAUSA300_0176 | -2.27 | ABC transporter, permease protein                                   |
| SAUSA300_0173 | -2.33 | Dipeptide/oligopeptide/nickel ABC transporter permease              |
| SAUSA300_2557 | -2.49 | ABC transporter protein                                             |
| SAUSA300_0613 | -2.57 | Putative Na <sup>+</sup> /H <sup>+</sup> antiporter, MnhD component |
| SAUSA300_0175 | -2.58 | Putative lipoprotein/ transporter                                   |
| SAUSA300_0614 | -2.6  | Putative Na <sup>+</sup> /H <sup>+</sup> antiporter, MnhE component |

**Other**

|               |      |                                                   |
|---------------|------|---------------------------------------------------|
| SAUSA300_0045 | 7.99 | HNH nucleases                                     |
| SAUSA300_0471 | 4    | Veg protein                                       |
| <i>sbrB</i>   | 3.87 | Small peptide encoding gene                       |
| <i>comK</i>   | 3.83 | Competence transcription factor                   |
| SAUSA300_0538 | 3.7  | Uncharacterized epimerase/dehydratase             |
| SAUSA300_0328 | 2.74 | Lipoate-protein ligase                            |
| SAUSA300_1198 | 2.53 | Putative GTP-binding protein                      |
| <i>cap5E</i>  | 2.29 | Capsular polysaccharide biosynthesis protein      |
| SAUSA300_0821 | 2.23 | SUF system FeS assembly protein                   |
| SAUSA300_2503 | 2.23 | Secretory antigen SsaA                            |
| <i>pknB</i>   | 2.19 | Serine/threonine kinase                           |
| <i>typA</i>   | 2.19 | GTP-binding protein                               |
| SAUSA300_0474 | 2.1  | Putative endoribonuclease, L-PSP                  |
| SAUSA300_0464 | 2.06 | Predicted O-methyltransferase                     |
| <i>scpB</i>   | 2.04 | Chromosome segregation and condensation protein B |

|               |       |                                                 |
|---------------|-------|-------------------------------------------------|
| SAUSA300_2512 | 2.01  | Glyoxalase family protein                       |
| SAUSA300_0135 | -2.04 | Superoxide dismutase                            |
| SAUSA300_0534 | -2.04 | Putative amidohydrolases                        |
| SAUSA300_0795 | -2.25 | Thioredoxin like protein                        |
| SAUSA300_0985 | -2.26 | Hypothetical protein                            |
| SAUSA300_0234 | -2.51 | Putative flavohemoprotein                       |
| <i>pcp</i>    | -3.52 | CDD-2,6-dichloro-p-hydroquinone 1,2-dioxygenase |
| SAUSA300_0043 | -9.73 | Metallo-beta-lactamase/Zn-dependent hydrolase   |

### Metabolism general

|                               |       |                                                   |
|-------------------------------|-------|---------------------------------------------------|
| <i>gap</i>                    | 4.65  | Glyceraldehyde-3-phosphate dehydrogenase 2        |
| SAUSA300_0170                 | 4.56  | Aldehyde dehydrogenase                            |
| SAUSA300_0229                 | 3.45  | Acyl-CoA transferase                              |
| SAUSA300_0662                 | 2.73  | Acetyltransferase, GNAT family                    |
| <i>sdhC</i>                   | 2.67  | Succinate dehydrogenase, cytochrome b-558 subunit |
| <i>acsA</i>                   | 2.45  | Acetyl-coenzyme A synthetase                      |
| SAUSA300_0425                 | 2.44  | NADH dehydrogenase I, F subunit                   |
| SAUSA300_2484                 | 2.38  | 3-hydroxy-3-methylglutaryl CoA synthase           |
| <i>gltA</i>                   | 2.37  | Citrate synthase II                               |
| SAUSA300_0945                 | 2.34  | Isochorismate synthase family protein             |
| SAUSA300_0424                 | 2.32  | Putative Cobalamin protein                        |
| <i>sucB</i>                   | 2.21  | Dihydrolipoyllysine-residue succinyltransferase   |
| <i>icd</i>                    | 2.14  | Isocitrate dehydrogenase                          |
| <i>sdhB</i>                   | 2.12  | Succinate dehydrogenase, iron-sulfur subunit      |
| SAUSA300_1986                 | 2.05  | Nitroreductase family protein                     |
| <i>sucA</i>                   | 2.03  | 2-oxoglutarate dehydrogenase, E1 component        |
| SAUSA300_1894                 | -2    | Nicotinate phosphoribosyltransferase              |
| SAUSA300_2316                 | -2.15 | Acetyltransferase                                 |
| SAUSA300_2475                 | -2.27 | Acyl-CoA thioester hydrolase                      |
| <i>budA</i> 2736735..2737440) | -2.32 | Alpha-acetolactate decarboxylase                  |
| <i>folP</i>                   | -2.53 | Dihydropteroate synthase                          |
| <i>panB</i>                   | -2.83 | 3-methyl-2-oxobutanoate hydroxymethyltransferase  |
| SAUSA300_0343                 | -2.84 | Acetyltransferase                                 |

### Regulation

|               |      |                                                     |
|---------------|------|-----------------------------------------------------|
| <i>gntR</i>   | 5.78 | Transcriptional regulator, GntR family              |
| <i>malR</i>   | 4.94 | Transcriptional regulator, maltose operon repressor |
| <i>scrR</i>   | 3.3  | Sucrose operon repressor                            |
| SAUSA300_0621 | 2.92 | MntR Mn Repressor                                   |
| <i>treR</i>   | 2.78 | Trehalose operon Repressor                          |
| SAUSA300_2310 | 2.77 | Putative transcriptional regulator                  |
| <i>nsaS</i>   | 2.74 | NsaS Histidine Kinase                               |
| <i>sarA</i>   | 2.66 | Staphylococcal accessory regulator A                |

|               |       |                                             |
|---------------|-------|---------------------------------------------|
| SAUSA300_0954 | 2.61  | Transcriptional regulator, MarR family      |
| SAUSA300_0095 | 2.26  | LysR Regulator, LysR family                 |
| SAUSA300_0023 | 2.2   | YycI protein                                |
| SAUSA300_2530 | 2.08  | Transcriptional regulator, TetR family      |
| SAUSA300_0090 | 2.05  | Hypothetical protein                        |
| SAUSA300_1583 | -2    | Cystine metabolism regulator                |
| SAUSA300_2509 | -2.07 | Transcriptional regulatory, TetR family     |
| <i>nirR</i>   | -2.12 | Nitrite reductase transcriptional regulator |
| <i>argR</i>   | -2.19 | Arginine repressor homolog                  |
| SAUSA300_0110 | -2.41 | Transcriptional Regulator, GntR family      |

### Translation

|               |       |                                    |
|---------------|-------|------------------------------------|
| <i>rpsO</i>   | 5.08  | 30S ribosomal protein S15          |
| <i>rpmB</i>   | 3.5   | 50S ribosomal protein L28          |
| <i>rumA</i>   | 3.41  | RNA methyltransferase              |
| SAUSA300_2037 | 3.31  | ATP-dependent RNA helicase         |
| <i>rpsB</i>   | 2.91  | 30S ribosomal protein S2           |
| <i>infC</i>   | 2.91  | Translation initiation factor IF-3 |
| <i>rplA</i>   | 2.67  | Ribosomal protein L1               |
| <i>rplM</i>   | 2.48  | 50S ribosomal protein L13          |
| <i>rpsI</i>   | 2.37  | 30S ribosomal protein S9           |
| <i>rluB</i>   | 2.3   | Pseudouridine synthase B           |
| <i>rplT</i>   | 2.28  | 50S ribosomal protein L20          |
| <i>rpmJ</i>   | 2.27  | 50S ribosomal protein L36          |
| <i>rpsT</i>   | 2.19  | 30S ribosomal protein S20          |
| SAUSA300_0531 | 2.13  | 30S ribosomal protein S7           |
| <i>rpsD</i>   | 2     | 30S ribosomal protein S4           |
| SAUSA300_1823 | -2.38 | tRNA-Ser                           |
| SAUSA300_1827 | -2.42 | tRNA-Met                           |

### Phage proteins

|               |       |                                                         |
|---------------|-------|---------------------------------------------------------|
| SAUSA300_1981 | 4.03  | Phage terminase family protein                          |
| SAUSA300_1959 | 3.48  | PhiPVL ORF044-like protein                              |
| SAUSA300_1943 | 2.94  | Phi77 ORF040-like protein                               |
| SAUSA300_1966 | 2.82  | Phi77 ORF014-like protein, phage anti-repressor protein |
| SAUSA300_1933 | 2.67  | Hypothetical phage protein                              |
| SAUSA300_1962 | 2.63  | PhiPVL ORF39-like protein                               |
| SAUSA300_1968 | 2.05  | Putative phage transcriptional regulator                |
| SAUSA300_1926 | -2.02 | Phi77 ORF044-like protein                               |
| SAUSA300_1954 | -2.13 | PhiPVL ORF050-like protein                              |
| SAUSA300_1948 | -2.21 | Phi77 ORF069-like protein                               |
| SAUSA300_1412 | -2.49 | PhiSLT ORF 50-like protein                              |
| SAUSA300_1953 | -2.68 | PhiPVL ORF051-like protein                              |

|               |       |                            |
|---------------|-------|----------------------------|
| SAUSA300_1951 | -3.06 | PhiPVL ORF052-like protein |
| SAUSA300_1952 | -3.81 | Phi083 ORF027-like protein |
| SAUSA300_1945 | -7.94 | Phi77 ORF071-like protein  |

---

#### Virulence determinants

---

|                |       |                                             |
|----------------|-------|---------------------------------------------|
| <i>mecA</i>    | 2.78  | Penicillin-binding protein 2a               |
| SAUSA300_1059  | 2.64  | Staphylococcal superantigen like protein 12 |
| <i>hlgA</i>    | 2.53  | Gamma-hemolysin, component A                |
| SAUSA300_1058  | 2.42  | Alpha-hemolysin                             |
| SAUSA300_0033  | 2.21  | Methicillin resistance regulator protein    |
| <i>splE</i>    | -2.02 | Serine protease                             |
| <i>sak</i>     | -2.11 | Staphylokinase                              |
| <i>nuc</i>     | -2.13 | Nuclease                                    |
| <i>splB</i>    | -2.44 | Serine protease                             |
| SAUSA300_0883  | -2.54 | Eap/Map protein                             |
| SAUSA300_2087  | -2.73 | Putative peptidase                          |
| <i>lukF-PV</i> | -3.13 | Panton-Valentine leukocidin, LukF-PV        |
| <i>lukS-PV</i> | -3.4  | Panton-Valentine leukocidin, LukS-PV        |
| <i>aur</i>     | -3.74 | Zinc metalloproteinase aureolysin           |

---

#### Purine and pyrimidine metabolism

---

|               |       |                                              |
|---------------|-------|----------------------------------------------|
| <i>deoD</i>   | 3.79  | Purine nucleoside phosphorylase              |
| <i>purD</i>   | 2.76  | Phosphoribosylamine--glycine ligase          |
| <i>purS</i>   | 2.67  | Phosphoribosylformylglycinamide synthase     |
| <i>purN</i>   | 2.55  | Phosphoribosylglycinamide formyltransferase  |
| <i>purH</i>   | 2.5   | Bifunctional purine biosynthesis protein     |
| <i>xseB</i>   | 2.44  | Exodeoxyribonuclease VII, small subunit      |
| <i>purM</i>   | 2.11  | Phosphoribosylformylglycinamide cyclo-ligase |
| <i>purB</i>   | 2.08  | Adenylosuccinate lyase                       |
| SAUSA300_2234 | -2.32 | Purine nucleosidase                          |

---

#### Membrane/lipoproteins

---

|               |       |                                    |
|---------------|-------|------------------------------------|
| SAUSA300_0724 | 2.49  | Putative lipoprotein               |
| SAUSA300_2448 | 2.35  | Putative membrane protein          |
| SAUSA300_1685 | 2.23  | Putative membrane protein          |
| SAUSA300_0922 | 2.1   | Membrane protein                   |
| SAUSA300_2355 | -2.23 | Putative lipoprotein               |
| <i>pfoR</i>   | -2.47 | Perfringolysin O regulator protein |
| SAUSA300_0443 | -2.49 | Putative Membrane protein          |
| SAUSA300_0233 | -2.64 | Putative Membrane protein          |
| SAUSA300_0410 | -3.18 | Staphylococcal tandem lipoprotein  |

---

---

**Sugar metabolism**

---

|               |       |                                                           |
|---------------|-------|-----------------------------------------------------------|
| <i>pfkA</i>   | -2.79 | 6-phosphofructokinase                                     |
| <i>gpmA</i>   | -2.04 | 2,3-bisphosphoglycerate-dependent phosphoglycerate mutase |
| <i>sdaAB</i>  | 2.24  | L-serine dehydratase, beta subunit                        |
| <i>gntK</i>   | 3.14  | Gluconate kinase                                          |
| <i>murQ</i>   | 3.4   | N-acetylmuramic acid-6-phosphate etherase                 |
| SAUSA300_2455 | 3.54  | Fructose-1,6-bisphosphatase                               |
| <i>treC</i>   | 3.69  | Alpha-phosphotrehalase                                    |
| <i>pckA</i>   | 3.87  | Phosphoenolpyruvate carboxykinase                         |
| SAUSA300_1456 | 5.52  | Alpha-amylase                                             |

---

**Stress response/repair**

---

|               |      |                           |
|---------------|------|---------------------------|
| SAUSA300_0777 | 4.01 | Cold shock protein C      |
| SAUSA300_0816 | 3.44 | CsbD-like protein         |
| <i>lexA</i>   | 2.89 | LexA repressor            |
| SAUSA300_2639 | 2.88 | Cold shock protein D      |
| <i>asp23</i>  | 2.39 | Alkaline shock protein 23 |
| SAUSA300_1549 | 2.37 | ComE operon protein I     |
| <i>clpB</i>   | 2.31 | Chaperone                 |
| <i>recA</i>   | 2.14 | Recombinase A             |

---

**Amino acid metabolism**

---

|               |       |                                              |
|---------------|-------|----------------------------------------------|
| <i>putA</i>   | 6.78  | Proline dehydrogenase                        |
| <i>ald</i>    | 2.08  | Alanine dehydrogenase                        |
| <i>leuD</i>   | 2.06  | 3-isopropylmalate dehydratase, small subunit |
| SAUSA300_0119 | -2.05 | Ornithine cyclodeaminase                     |
| SAUSA300_0952 | -2.75 | Aminotransferase, class I                    |

---

**PTS system components**

---

|               |      |                                               |
|---------------|------|-----------------------------------------------|
| <i>treP</i>   | 3.89 | PTS system, trehalose-specific IIBC component |
| SAUSA300_2324 | 3.72 | PTS system, sucrose-specific IIBC component   |
| SAUSA300_0332 | 3.45 | PTS system, IIA component                     |
| SAUSA300_0331 | 2.74 | PTS IIB - ascorbate, lactose or cellobiose    |
| <i>ptsG</i>   | 2.17 | PTS system, glucose-specific IIABC component  |

---

**Cell wall**

---

|               |      |                                         |
|---------------|------|-----------------------------------------|
| SAUSA300_1702 | 4.86 | Cell wall surface anchor family protein |
| SAUSA300_0703 | 2.84 | Lipoteichoic acid synthase              |
| <i>lytN</i>   | 2.31 | Cell wall hydrolase                     |
| SAUSA300_2435 | 2.01 | Cell wall surface anchor family protein |

---

**Replication**

---

|               |       |                                                   |
|---------------|-------|---------------------------------------------------|
| SAUSA300_1344 | 2.95  | Putative DNA-replication protein, DnaD            |
| SAUSA300_1042 | 2.15  | DNA polymerase IV (family X)                      |
| <i>nrdG</i>   | -3.48 | Anaerobic ribonucleotide reductase, small subunit |
| <i>nrdD</i>   | -4.59 | Anaerobic ribonucleotide reductase, large subunit |

---

**Lipid Metabolism**

---

|             |       |                           |
|-------------|-------|---------------------------|
| <i>lip</i>  | 3.67  | Triacylglycerol lipase    |
| <i>acpP</i> | 3.25  | Acyl carrier protein      |
| <i>plsX</i> | 2.11  | Phosphate acyltransferase |
| <i>estA</i> | -2.33 | Tributyryl esterase       |

---

**Transcription**

---

|             |        |                                 |
|-------------|--------|---------------------------------|
| <i>rpoC</i> | 2.6    | RNAP Beta' subunit              |
| <i>nusA</i> | 2.11   | Transcription elongation factor |
| <i>rpoZ</i> | -10.03 | RNAP omega subunit              |

**Table S2:** List comparing the 20 most downregulated genes in a *S. aureus* SH1000  $\sigma^B$  mutant strain (which have homologues in USA300) to the alterations in transcript abundance of the homologue genes in a USA300  $\Delta rpoZ$  strain.

| Feature ID SH1000 | Fold-Change<br>( <i>sigB::tet</i> ) | Feature ID USA300 | Gene name    | Fold Change<br>( $\Delta rpoZ$ ) |
|-------------------|-------------------------------------|-------------------|--------------|----------------------------------|
| SAOUHSC_00624     | $-\infty$                           | SAUSA300_0609     |              | -1.61                            |
| SAOUHSC_02442     | $-\infty$                           | SAUSA300_2143     |              | -1.10                            |
| SAOUHSC_02882     | $-\infty$                           | SAUSA300_2502     |              | 1.41                             |
| SAOUHSC_02443     | -15,213.97                          | SAUSA300_2144     |              | 1.31                             |
| SAOUHSC_00845     | -4,178.80                           | SAUSA300_0816     |              | 3.44                             |
| SAOUHSC_02441     | -3,188.61                           | SAUSA300_2142     | <i>asp23</i> | 2.39                             |
| SAOUHSC_02444     | -1,540.56                           | SAUSA300_2145     |              | -1.16                            |
| SAOUHSC_00356     | -667.21                             | SAUSA300_0372     |              | 1.11                             |
| SAOUHSC_01729     | -546.86                             | SAUSA300_1581     |              | 1.45                             |
| SAOUHSC_00358     | -321.83                             | SAUSA300_0374     |              | 1.86                             |
| SAOUHSC_02466     | -142.55                             | SAUSA300_2164     |              | 1.52                             |
| SAOUHSC_02387     | -139.11                             | SAUSA300_2097     |              | -1.39                            |
| SAOUHSC_03032     | -97.75                              | SAUSA300_2629     |              | -1.13                            |
| SAOUHSC_02774     | -95.56                              | SAUSA300_2418     |              | -1.08                            |
| SAOUHSC_01730     | -89.95                              | SAUSA300_1582     |              | 2.07                             |
| SAOUHSC_02772     | -77.38                              | SAUSA300_2416     |              | 1.13                             |
| SAOUHSC_00831     | -75.12                              | SAUSA300_0786     |              | 1.19                             |
| SAOUHSC_02880     | -70.09                              | SAUSA300_2500     |              | 1.64                             |
| SAOUHSC_02881     | -62.08                              | SAUSA300_2501     |              | 1.44                             |
| SAOUHSC_02812     | -54.8                               | SAUSA300_2447     |              | 1.90                             |



**Table S3:** List comparing the 20 most upregulated genes in a *S. aureus* SH1000  $\sigma^B$  mutant strain (which have homologues in USA300) to the alterations in transcript abundance of the homologue genes in a USA300  $\Delta rpoZ$  strain.

| Feature ID SH1000 | Fold-Change<br>( <i>sigB::tet</i> ) | Feature ID USA300 | Gene name   | Fold Change<br>( $\Delta rpoZ$ ) |
|-------------------|-------------------------------------|-------------------|-------------|----------------------------------|
| SAOUHSC_00260     | $\infty$                            | SAUSA300_0281     |             | -1.45                            |
| SAOUHSC_01315     | $\infty$                            | SAUSA300_1221     |             | 1.20                             |
| SAOUHSC_00069     | 80.09                               | SAUSA300_0113     | <i>spa</i>  | -1.54                            |
| SAOUHSC_02821     | 75.93                               | SAUSA300_2454     |             | -2.05                            |
| SAOUHSC_00818     | 29.22                               | SAUSA300_0776     | <i>nuc</i>  | -2.13                            |
| SAOUHSC_03002     | 21.68                               | SAUSA300_2600     | <i>icaA</i> | -1.06                            |
| SAOUHSC_02820     | 16.26                               | SAUSA300_2453     |             | -2.10                            |
| SAOUHSC_00674     | 13.42                               | SAUSA300_0654     | <i>sarX</i> | -1.50                            |
| SAOUHSC_00259     | 11.98                               | SAUSA300_0280     |             | 1.01                             |
| SAOUHSC_00913     | 11.1                                | SAUSA300_0878     |             | -1.68                            |
| SAOUHSC_00072     | 10.88                               | SAUSA300_0116     | <i>sirB</i> | 1.19                             |
| SAOUHSC_02461     | 10.74                               | SAUSA300_2160     |             | 1.19                             |
| SAOUHSC_00244     | 9.97                                | SAUSA300_0266     |             | -1.77                            |
| SAOUHSC_03004     | 9.64                                | SAUSA300_2601     | <i>icaB</i> | -1.41                            |
| SAOUHSC_00492     | 9.19                                | SAUSA300_0495     |             | 1.01                             |
| SAOUHSC_02639     | 7.73                                | SAUSA300_2305     |             | -1.21                            |
| SAOUHSC_00250     | 7.03                                | SAUSA300_0272     |             | 1.07                             |
| SAOUHSC_03036     | 6.24                                | SAUSA300_2633     |             | 1.00                             |
| SAOUHSC_01488     | 6.23                                | SAUSA300_1361     |             | -1.12                            |
| SAOUHSC_01941     | 6.02                                | SAUSA300_1757     | <i>spIB</i> | -2.44                            |
